# Supplementary material
Source: PubMed Central journal article supplement (PMC2665107)
Supplement: M809771200_1.pdf [file M809771200_1.pdf]

## SUPPLEMENTAL MATERIAL

**Table S1. Amino acids 90-104 are strictly conserved in Class I EPSP synthases.**

| <u>EPSPS</u>                 | <u>Amino Acid Residue</u>                       |
|------------------------------|-------------------------------------------------|
| <i>Escherichia coli</i>      | <sup>90</sup> LFLGN AGTAM RPLAA <sup>104</sup>  |
| <i>Klebsiella pneumoniae</i> | <sup>90</sup> LFLGN AGTAM RPLAA <sup>104</sup>  |
| <i>Salmonella typhi</i>      | <sup>90</sup> LFLGN AGTAM RPLAA <sup>104</sup>  |
| <i>Zea mays</i>              | <sup>95</sup> LFLGN AGTAM RPLTA <sup>109</sup>  |
| <i>Petunia hybrida</i>       | <sup>167</sup> LFLGN AGTAM RPLTA <sup>181</sup> |

**TABLE S2. Changes in backbone torsion angles of residues 96 to 98 as a result of Thr<sup>97</sup>/Pro<sup>101</sup> mutations.**

|                                  | WT EPSPS          |                   |                   | T97I EPSPS        |                   |                   | TIPS EPSPS        |                   |                   |
|----------------------------------|-------------------|-------------------|-------------------|-------------------|-------------------|-------------------|-------------------|-------------------|-------------------|
| <i>S3P + Glyphosate bound</i>    | Gly <sup>96</sup> | Thr <sup>97</sup> | Ala <sup>98</sup> | Gly <sup>96</sup> | Thr <sup>97</sup> | Ala <sup>98</sup> | Gly <sup>96</sup> | Thr <sup>97</sup> | Ala <sup>98</sup> |
| <b>Torsion Angle<sup>a</sup></b> |                   |                   |                   |                   |                   |                   |                   |                   |                   |
| $\Phi$                           | -63°              | -72°              | -104°             | -61°              | -78°              | -106°             | -58°              | -62°              | -67°              |
| $\psi$                           | -34°              | -5.6°             | -50°              | -39°              | 5.0°              | -50°              | -50°              | -36°              | -48°              |
| $\omega$                         | -178°             | 170°              | -178°             | -178°             | 171°              | -178°             | -178°             | 178°              | 180°              |
| Planarity                        | 0.32°             | -0.03°            | 0.84°             | 0.1°              | 0.23°             | -0.3°             | -0.5°             | -1.7°             | -0.27°            |
| <i>S3P bound</i>                 | Gly <sup>96</sup> | Thr <sup>97</sup> | Ala <sup>98</sup> | Gly <sup>96</sup> | Thr <sup>97</sup> | Ala <sup>98</sup> | Gly <sup>96</sup> | Thr <sup>97</sup> | Ala <sup>98</sup> |
| <b>Torsion Angle</b>             |                   |                   |                   |                   |                   |                   |                   |                   |                   |
| $\Phi$                           | -59°              | -72°              | -106°             | -61°              | -76°              | -107°             | -57°              | -61°              | -61°              |
| $\psi$                           | -38°              | -4.3°             | -47°              | -40°              | 3.4°              | -50°              | -56°              | -41°              | -47°              |
| $\omega$                         | -179°             | 172°              | -178°             | -178°             | 173°              | -179°             | -180°             | 179°              | 179°              |
| Planarity                        | -0.14°            | 1.65°             | -0.25°            | -0.6°             | -0.1°             | -0.83°            | 1.0°              | -0.88°            | 0.4°              |

<sup>a</sup> The torsion angles were calculated with Moleman2 (1), with  $\Phi = C(i-1) - N(i) - CA(i) - C(i)$ ,  $\psi = N(i) - CA(i) - C(i) - N(i+1)$ ,  $\omega = CA(i) - C(i) - N(i+1) - CA(i+1)$ , and planarity =  $C(i) - CA(i) - N(i+1) - O(i)$

(1) Kleywegt, G. J. (2001) *International Tables for Crystallography*, Kluwer Academic Publishers, **Volume F**, 497-506, 526-528.

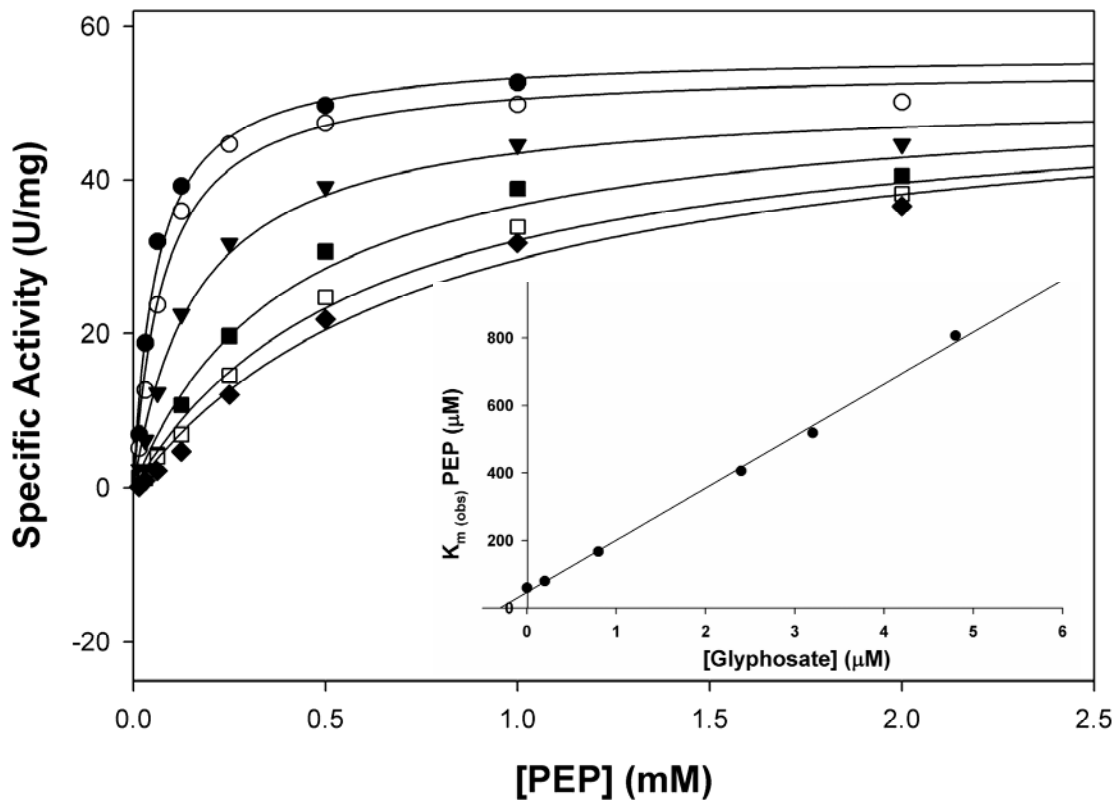

FIGURE S1. **Inhibition of wild-type EPSPS by glyphosate: determination of  $K_i$ .**

Substrate saturation in the presence of increasing concentrations of glyphosate: 0  $\mu\text{M}$  ( $\bullet$ ), 0.2  $\mu\text{M}$  ( $\circ$ ), 0.8  $\mu\text{M}$  ( $\blacktriangledown$ ), 2.4  $\mu\text{M}$  ( $\blacksquare$ ), 3.2  $\mu\text{M}$  ( $\square$ ), and 4.8  $\mu\text{M}$  ( $\blacklozenge$ ). S3P concentration was 1 mM. Enzyme concentration was 1.4 nM. Data were fit to the Michaelis-Menten equation.

Inset: Replot of the observed  $K_m$  values as a function of glyphosate concentration. Data were fit to equation (1) yielding  $K_i$  of  $0.3 \pm 0.07 \mu\text{M}$ .

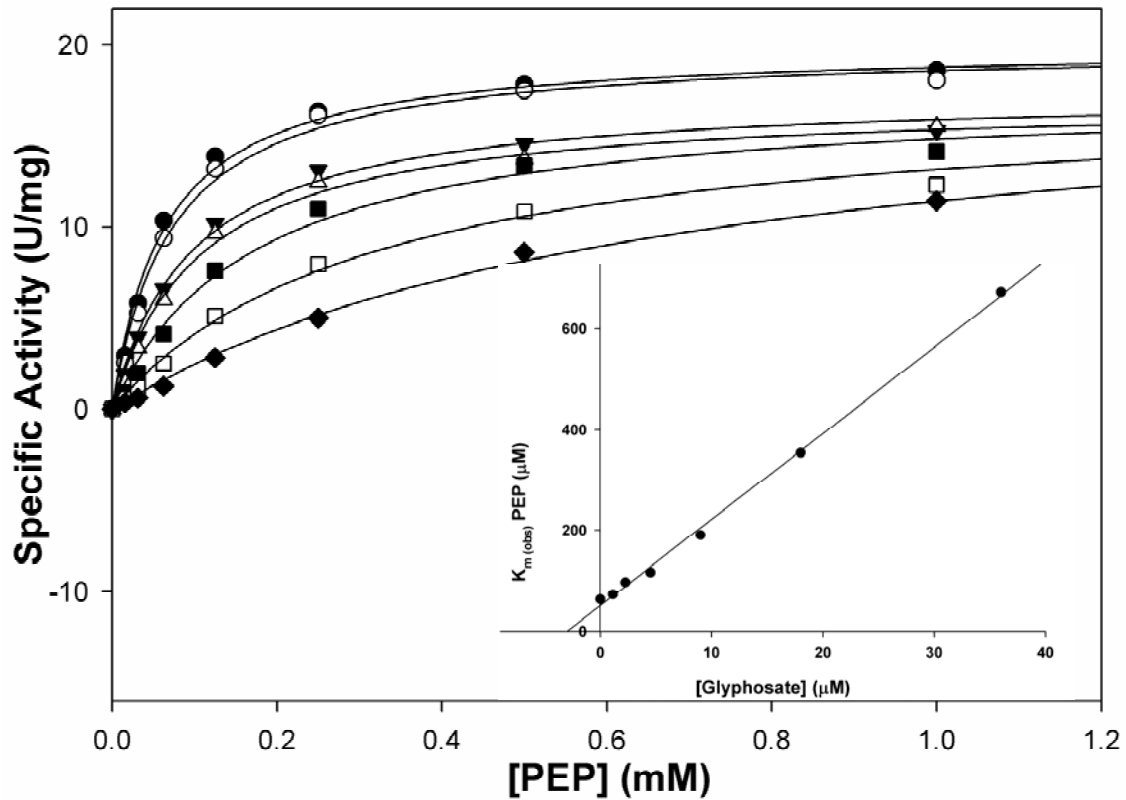

**FIGURE S2. Inhibition of P101S EPSPS by glyphosate: determination of  $K_i$ .**

Substrate saturation in the presence of increasing concentrations of glyphosate: 0  $\mu\text{M}$  ( $\bullet$ ), 1.1  $\mu\text{M}$  ( $\circ$ ), 2.3  $\mu\text{M}$  ( $\blacktriangledown$ ), 4.5  $\mu\text{M}$  ( $\triangle$ ), 9.0  $\mu\text{M}$  ( $\blacksquare$ ), 18.0  $\mu\text{M}$  ( $\square$ ), and 36.0  $\mu\text{M}$  ( $\blacklozenge$ ). S3P concentration was 1 mM. Enzyme concentration was 2.9 nM. Data were fit to the Michaelis-Menten equation.

Inset: Replot of the observed  $K_m$  values as a function of glyphosate concentration. Data were fit to equation (1) yielding  $K_i$  of  $3.0 \pm 0.3 \mu\text{M}$ .

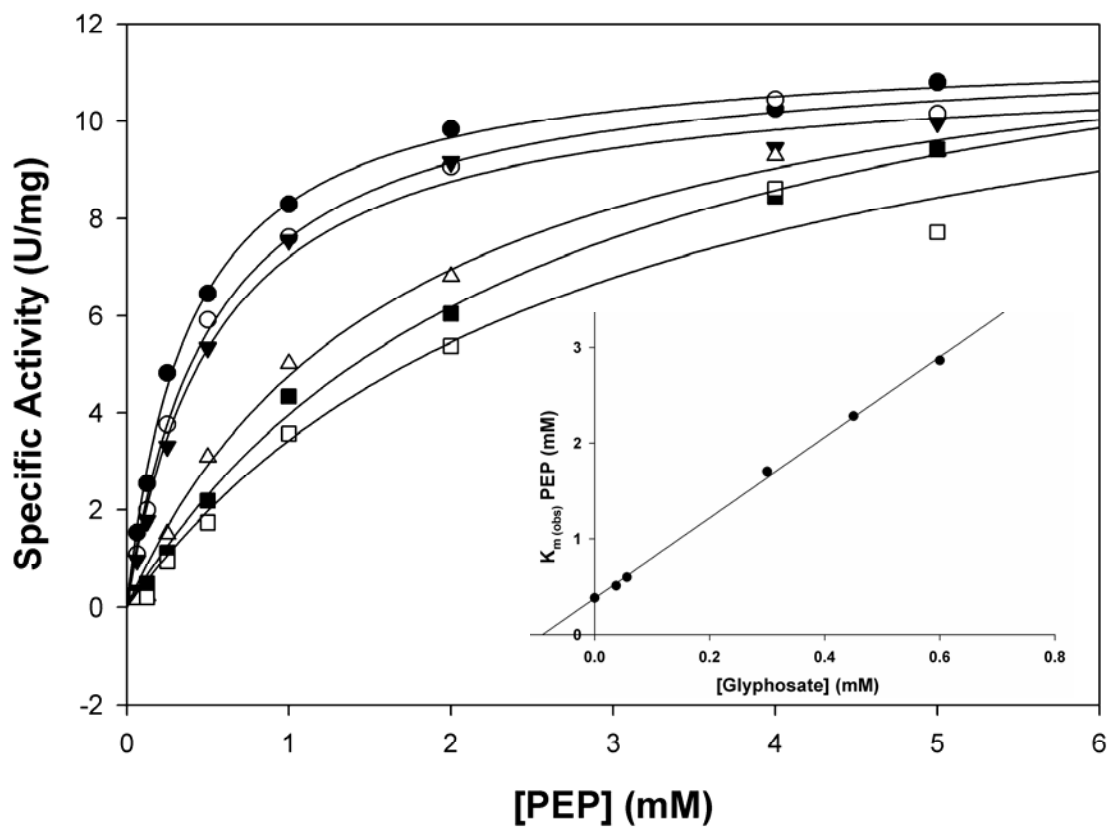

FIGURE S3. **Inhibition of T97I EPSPS by glyphosate: determination of  $K_i$ .**

Substrate saturation in the presence of increasing concentrations of glyphosate: 0  $\mu$ M (●), 0.038 mM (○), 0.056 mM (▼), 0.30 mM (△), 0.45 mM (■), and 0.60 mM (□). S3P concentration was 1 mM. Enzyme concentration was 5.1 nM. Data were fit to the Michaelis-Menten equation.

Inset: Replot of the observed  $K_m$  values as a function of glyphosate concentration. Data were fit to equation (1) yielding  $K_i$  of  $90 \pm 6 \mu$ M

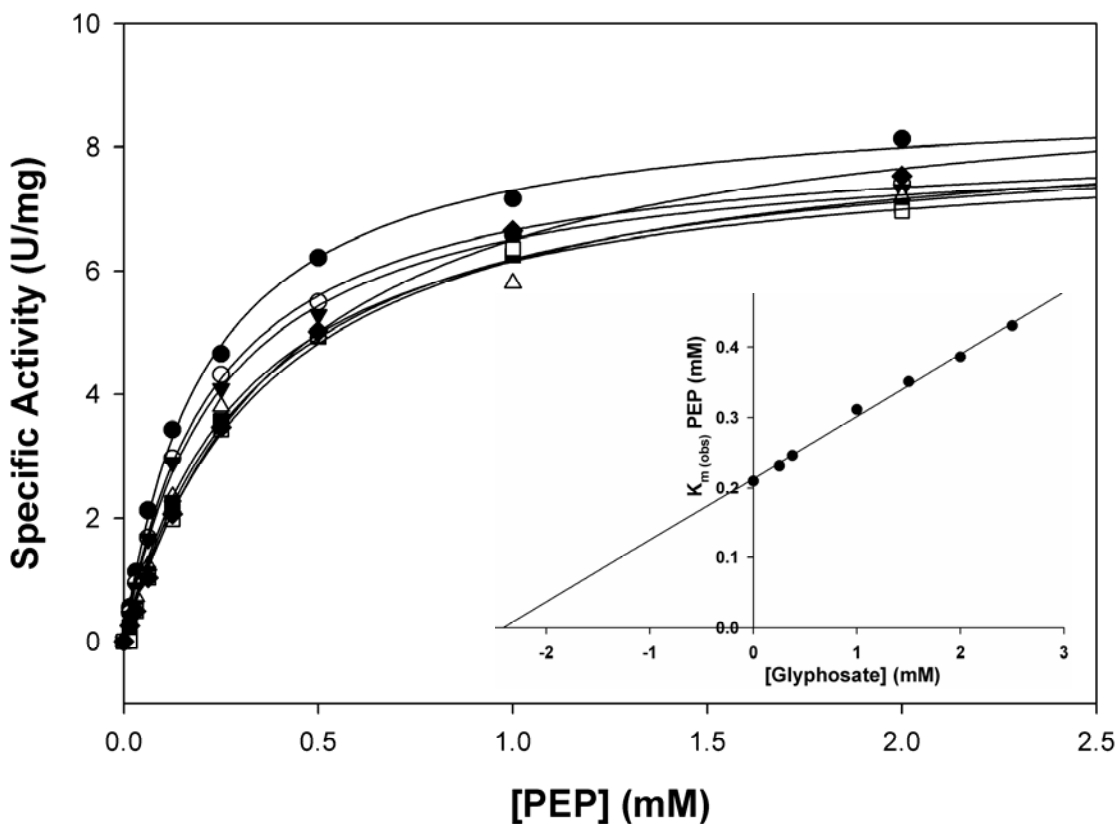

FIGURE S4. **Inhibition of TIPS EPSPS by glyphosate: determination of  $K_i$ .**

Substrate saturation in the presence of increasing concentrations of glyphosate: 0  $\mu$ M ( $\bullet$ ), 0.25 mM ( $\circ$ ), 0.375 mM ( $\blacktriangledown$ ), 1.0 mM ( $\triangle$ ), 1.5 mM ( $\blacksquare$ ), 2.0 mM ( $\square$ ), and 2.5 mM ( $\blacklozenge$ ). S3P concentration was 1 mM. Enzyme concentration was 7.9 nM. Data were fit to the Michaelis-Menten equation.

Inset: Replot of the observed  $K_m$  values as a function of glyphosate concentration. Data were fit to equation (1) yielding  $K_i$  of  $2420 \pm 87 \mu$ M.

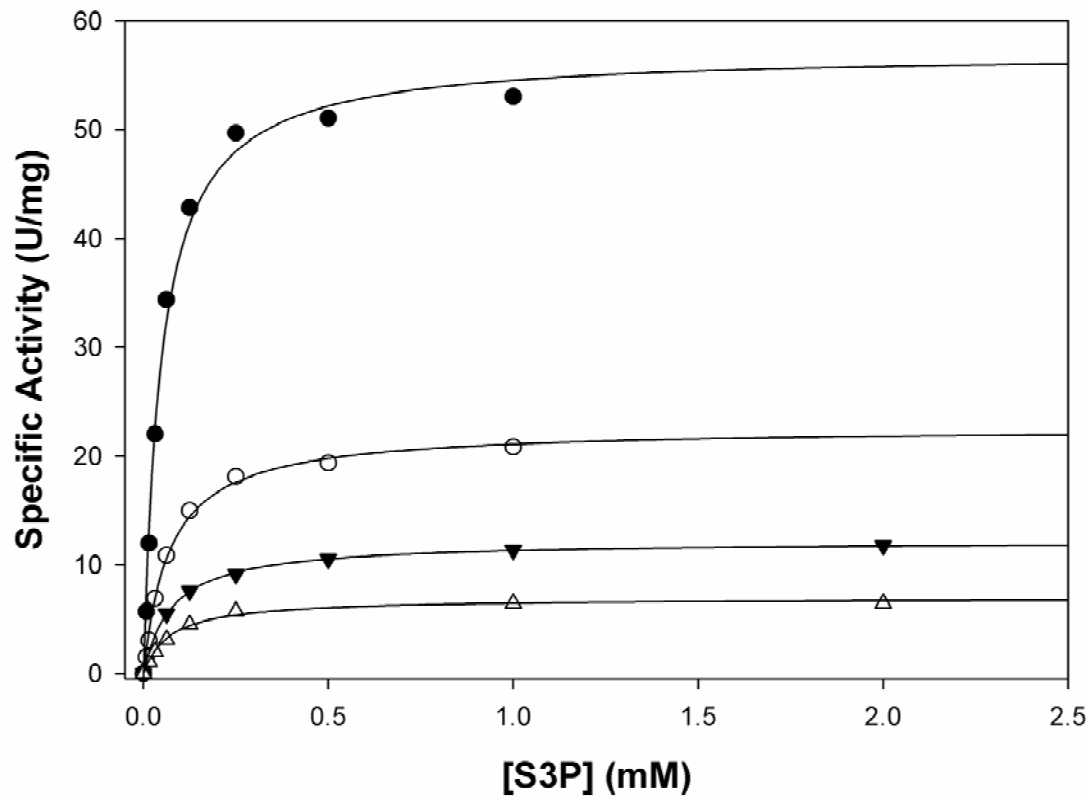

**FIGURE S5. Activity of wild-type and mutant enzymes: determination of the  $K_m$  for S3P.** Substrate saturation curves for WT (●), P101S (○), T97I (▼), and TIPS (△) using 1 mM PEP and increasing concentrations of S3P. Data were fit to the Michaelis-Menten equation yielding the  $K_m$  values listed in Table 2.

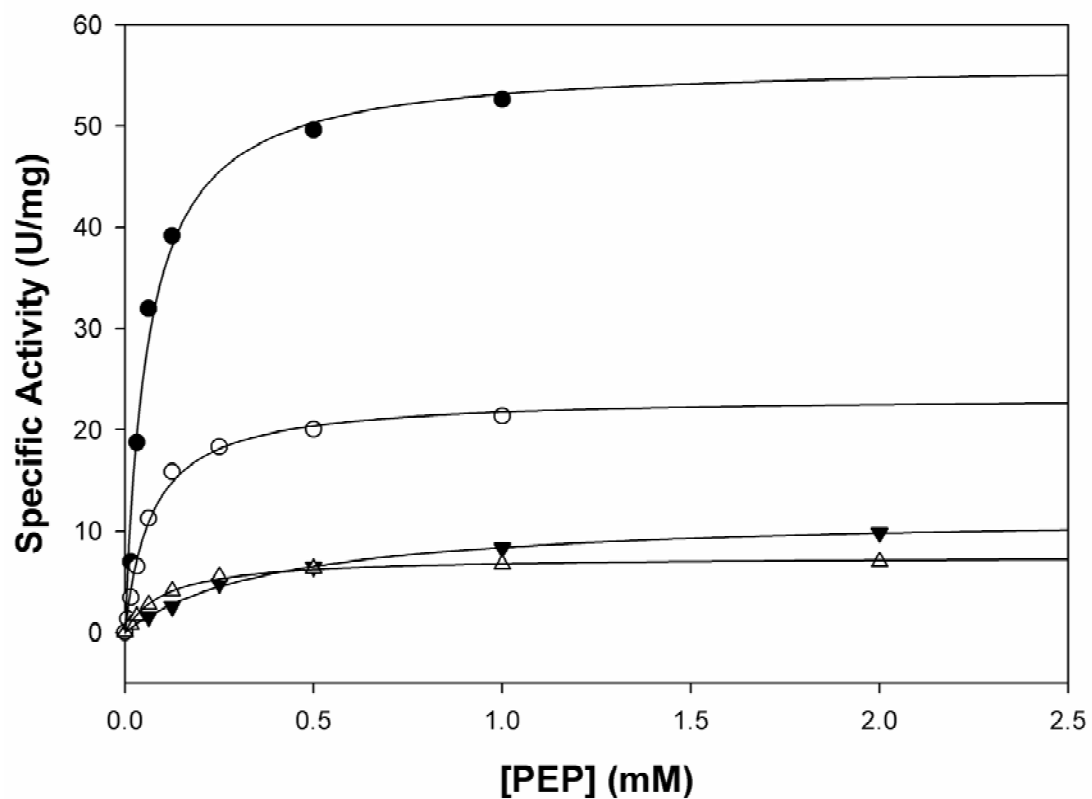

**FIGURE S6. Activity of wild-type and mutant enzymes: determination of the  $K_m$  for PEP.** Substrate saturation curves for WT (●), P101S (○), T97I (▼), and TIPS (△) using 1 mM S3P and increasing concentrations of PEP. Data were fit to the Michaelis-Menten equation yielding the  $K_m$  values listed in Table 2.



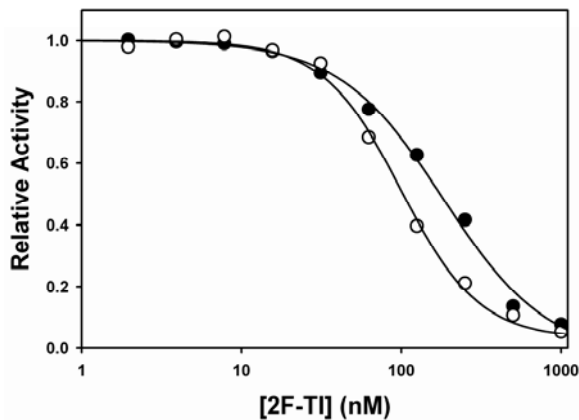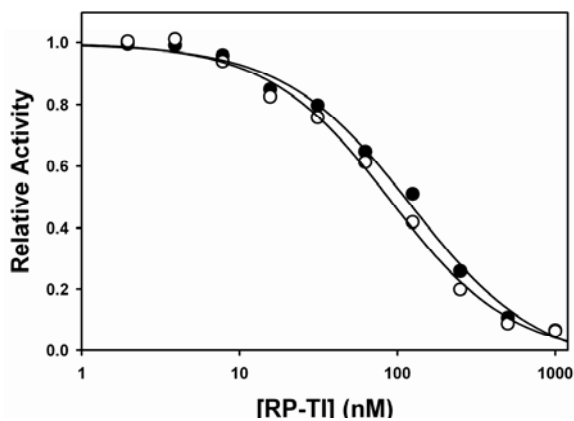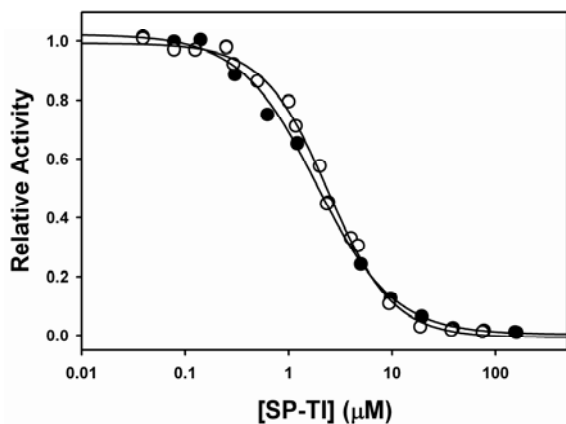

**FIGURE S7. Inhibition of TIPS and WT EPSPS by analogs of the tetrahedral reaction intermediate (TI).**

Enzymatic activity was determined in the presence of increasing concentrations of the (*R*)-difluoro-TI analog (2F-TI), the (*R*)-phosphonate-TI analog (RP-TI), and the (*S*)-phosphonate-TI analog (SP-TI).

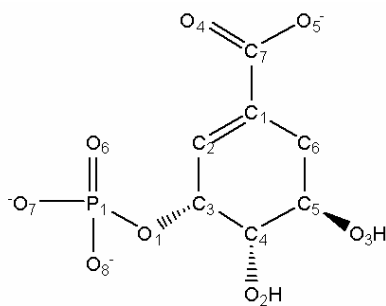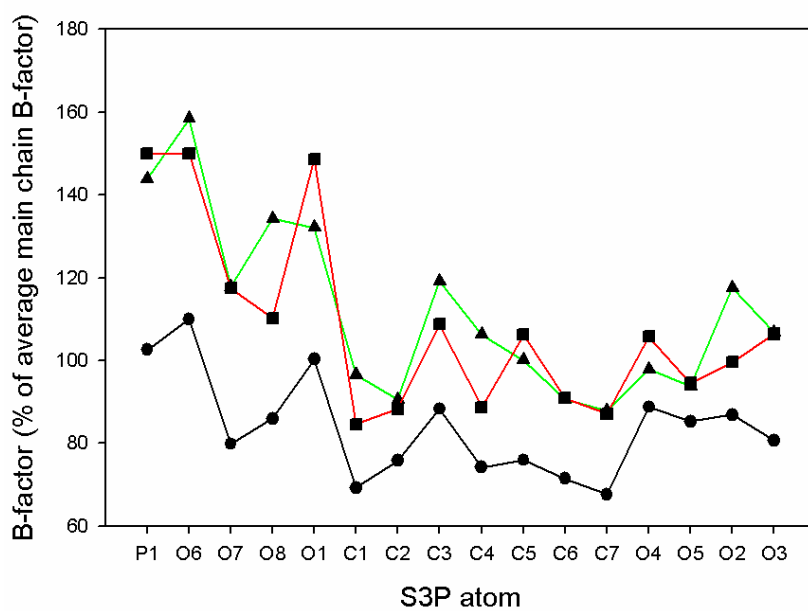

**FIGURE S8. Impact of the mutations on the S3P molecule.**

The average B-factor of the S3P molecule when bound to the T97I (▲) and TIPS (■) enzymes is slightly increased over S3P bound in the WT enzyme (●).
